# Supplementary material for: A New Formulation for Strigolactone Suicidal Germination Agents, towards Successful Striga Management
Source: MDPI journal article supplement (doi:10.3390/plants11060808), 2022-03-18
Supplement: s1 [file s1]

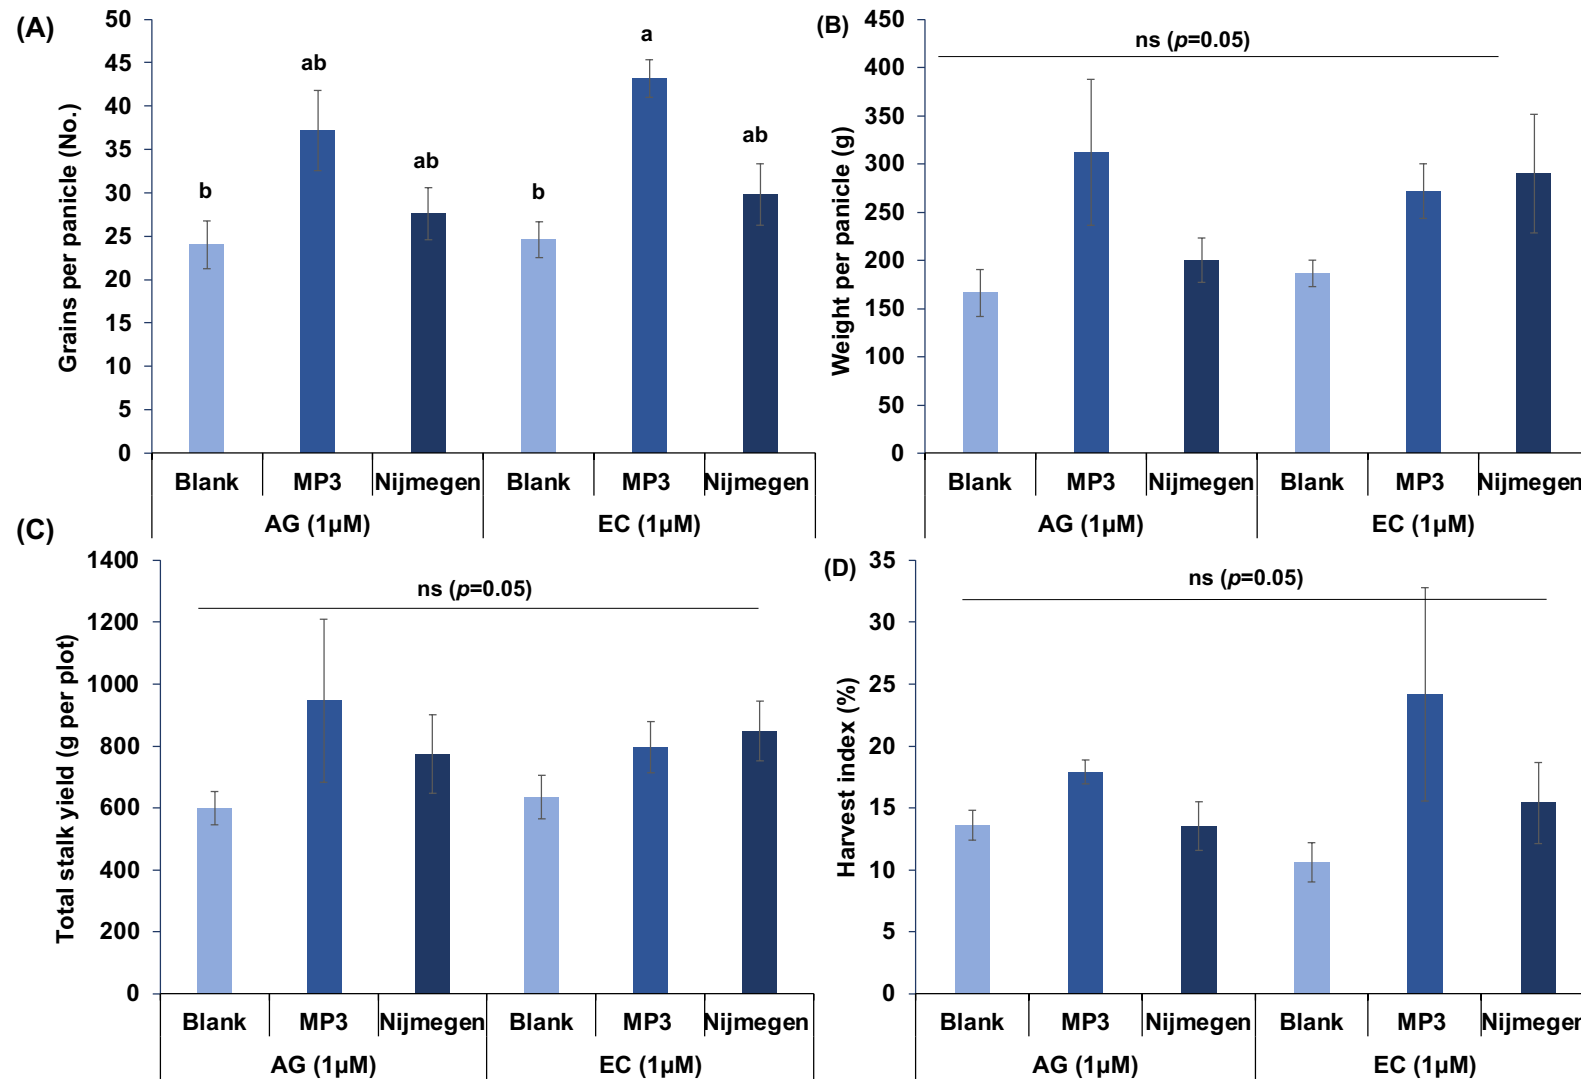

**Supplementary Figure S1.** Effect of various formulations of SL analogs on number of grains per panicle, panicle dry biomass, total stalk yield and harvest index in Pearl millet field at INERA, Burkina Faso. **(A)** Average grains per panicle **(B)** Average weight of dry panicle **(C)** Average stalk yield and **(D)** Average of harvest index from *Striga* infested Pearl millet field in response to formulated MP3 and Nijmegen application. Both SL analogs of EC and AG formulations (at 1.0  $\mu$ M) were applied in *Striga* infested Pearl millet. Yield and yield component were measured after 110 days of pearl millet planting. Data are means  $\pm$  SE ( $n=5$ ). For each SL analog, treatments with various letters differ significantly ( $p < 0.05$ ). Values in parenthesis are showing the percentage increase (+) or decrease (-) over blank treatment. *ns*: non-significant.

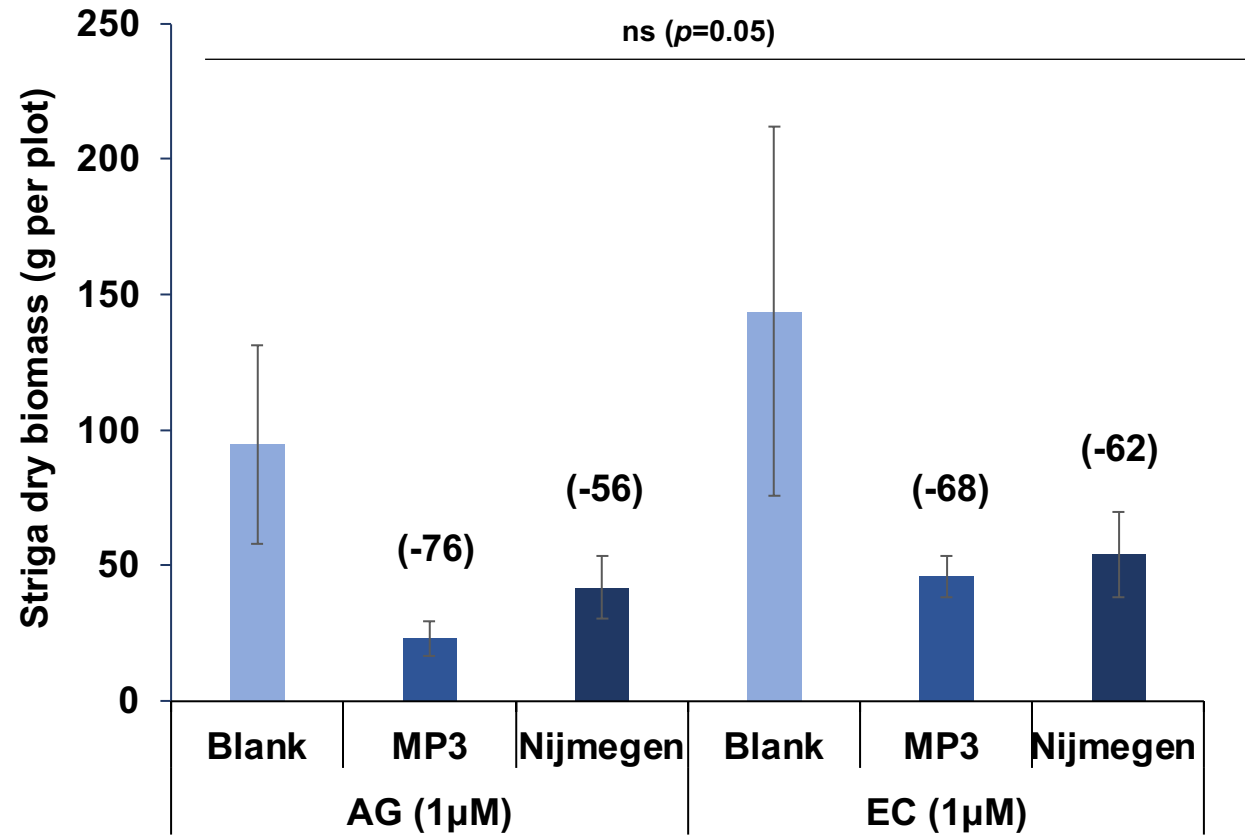

**Supplementary Figure S2.** Effect of various formulations of SL analogs on *Striga* dry biomass at Burkina Faso. Average *Striga* dry biomass emerged in Sorghum field in response to formulated MP3 and Nijmegen application. Both SL analogs of EC and AG formulations (at 1.0  $\mu$ M) were applied in *Striga* infested Sorghum fields. *Striga* seedlings were collected from Sorghum infested field and *Striga* dry biomass was measured at final harvest. Values of each bar showed average of *Striga* dry biomass emerged per plot. Data are means  $\pm$  SE ( $n=5$ ). For each SL analog, treatments with various letters differ significantly ( $p < 0.05$ ). Values in parenthesis are showing the percentage increase (+) or decrease (-) over blank treatment. *ns*: non-significant.

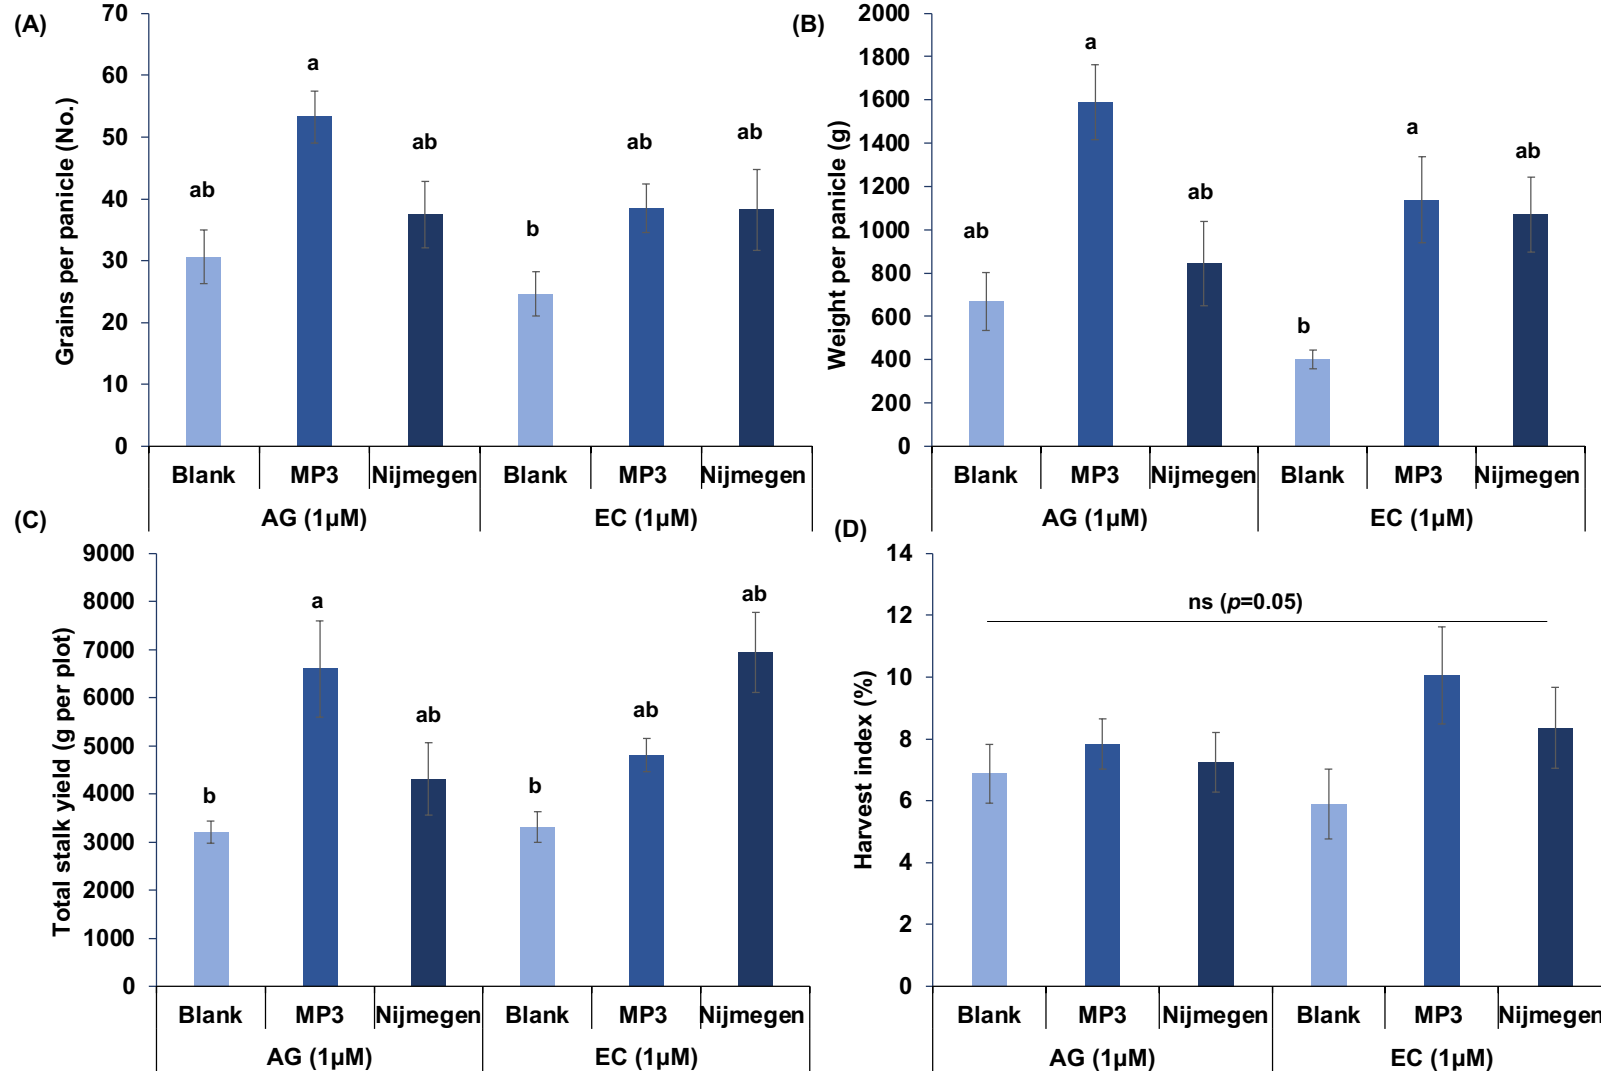

**Supplementary Figure S3.** Effect of various formulations of SL analogs on number of grains per panicle, panicle dry biomass, total stalk yield and harvest index from *Striga* infested Sorghum field at INERA, Burkina Faso. **(A)** Average grains per panicle, **(B)** Average weight of panicle, **(C)** Average stalk yield and **(D)** Average of harvest index from *Striga* infested Sorghum field in response to formulated MP3 and Nijmegen application. Both SL analogs of EC and AG formulations (at 1.0  $\mu$ M) were applied in *Striga* infested Sorghum field. Yield and yield component were measured after 110 days of Sorghum planting. Values of each bar showed average of *Striga* emergence per plot. Data are means $\pm$  SE ( $n=5$ ). For each SL analog, treatments with various letters differ significantly ( $p < 0.05$ ). Values in parenthesis are showing the percentage increase (+) or decrease (-) over blank treatment. *ns*: non-significant.
