# Supplementary material for: A New Formulation for Strigolactone Suicidal Germination Agents, towards Successful Striga Management
Source: MDPI journal article supplement (doi:10.3390/plants11060808), 2022-03-18
Supplement: s1 [file s1]

Preparation Date 14-May-2020

Revision Date -

Revision Number 01

## 1. IDENTIFICATION OF THE SUBSTANCE/PREPARATION AND OF THE COMPANY/UNDERTAKING

### Product Identifier

Product Description MP3 27 EC

### Recommended use of the chemical and restriction on use

Recommended use R&D material to be handled by technically qualified individuals only

Uses advised against

### Details of the Supplier of the Safety Data Sheet

#### Supplier Address

**UPL Limited**  
Uniphos House, Madhu Park,  
Khar (W), Mumbai, India  
Tel: +91-(022)- 2646-8000

E-mail address info.in@uniphos.com

### Emergency Telephone Number

Company Phone Number +91-(022)- 2646-8000  
Emergency telephone number +91-(022)- 2646-8000 (From 9:00 A.M. to 8:00 P.M.)

## 2. Hazard Identification

### Classification

|                           |                      |
|---------------------------|----------------------|
| Flammable Liquid          | Category 3 - (H226)  |
| Skin corrosion/Irritation | Category 2 - (H315)  |
| Eye Damage/Irritation     | Category 2A - (H319) |
| Carcinogenicity           | Category 1B - (H350) |
| Reproductive toxicity     | Category 2 - (H361)  |
| STOT - Single Exposure    | Category 3 - (H335)  |
| STOT - Single Exposure    | Category 3 - (H336)  |
| STOT - Repeated Exposure  | Category 2 - (H373)  |
| Aquatic Acute Hazard      | Category 1 - (H400)  |
| Aquatic Chronic Hazard    | Category 2 - (H411)  |

### Label elements

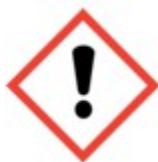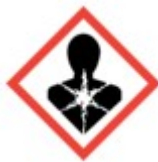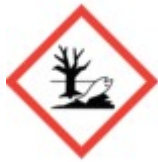

Signal word

Warning

Hazard Statements

Preparation Date 14-May-2020

Revision Date -

Revision Number 01

**H226** - Flammable liquid  
**H315** - Causes skin irritation  
**H319** - Causes serious eye irritation  
**H335** - May cause respiratory irritation  
**H336** - May cause drowsiness or dizziness  
**H350** - May cause cancer  
**H361** - Suspected of damaging fertility or the unborn child  
**H373** - May cause damage to organs through prolonged or repeated exposure  
**H400** - Very toxic to aquatic life  
**H411** - Toxic to aquatic life with long lasting effects

## Precautionary Statements

### Prevention

P201 - Obtain special instructions before use  
 P202 - Do not handle until all safety precautions have been read and understood  
 P210 - Keep away from heat, hot surfaces, open flames, sparks. - No smoking  
 P260 - Do not breathe dust, fume, gas, mist, spray, vapors  
 P261 - Avoid breathing dust, fume, gas, mist, spray, vapors  
 P264 - Wash hands thoroughly after handling  
 P271 - Use only outdoors or in a well-ventilated area  
 P273 - Avoid release to the environment  
 P280 - Wear protective clothing, protective gloves, eye protection  
  
 P301 + P310 - If swallowed: Immediately call a doctor, a POISON CENTER  
 P302 + P352 - If on skin: Wash with plenty of water  
 P304 + P340 - If inhaled: Remove person to fresh air and keep comfortable for breathing  
 P305+P351+P338 - If in eyes: Rinse cautiously with water for several minutes. Remove contact lenses, if present and easy to do. Continue rinsing  
 P308 + P313 - If exposed or concerned: Get medical advice/attention  
 P312 - Call a doctor, a POISON CENTER if you feel unwell  
 P314 - Get medical advice/attention if you feel unwell  
 P321 - Specific treatment (see a doctor on this label)  
 P331 - Do NOT induce vomiting  
 P332 + P313 - If skin irritation occurs: Get medical advice/attention  
 P337 + P313 - If eye irritation persists: Get medical advice/attention  
 P362 + P364 - Take off contaminated clothing and wash it before reuse  
 P370 + P378 - In case of fire: Use alcohol resistant foam, carbon dioxide (CO2), dry extinguishing powder, Water spray to extinguish  
 P391 - Collect spillage  
  
 P403 + P233 - Store in a well-ventilated place. Keep container tightly closed  
 P403 + P235 - Store in a well-ventilated place. Keep cool  
 P405 - Store locked up  
  
 P501 - Dispose of contents/container to hazardous or special waste collection point, in accordance with local, regional, national and/or international regulation

### Other Information

No other hazards known.

## 3. Composition/information on Ingredients

| Chemical name                                     | CAS-No      | W/W %   |
|---------------------------------------------------|-------------|---------|
| Solvent naphtha                                   | 64742-94-5  | 40 - 60 |
| (E)-methyl 3-(4-methyl-5-oxo-2, 5-dihydrofuran-2- | 141250-21-7 | 1 - 5   |

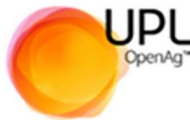

Preparation Date 14-May-2020

Revision Date -

Revision Number 01

|                         |  |  |
|-------------------------|--|--|
| ylaxy)-2-phenylacrylate |  |  |
|                         |  |  |

If CAS number is "proprietary", the specific chemical identity and percentage of composition has been withheld as a trade secret.

## 4. First aid measures

### First-aid measures

|                     |                                                                                                                                                                                                                                                             |
|---------------------|-------------------------------------------------------------------------------------------------------------------------------------------------------------------------------------------------------------------------------------------------------------|
| <b>Eye contact</b>  | Hold eyes open and rinse slowly and gently with water for 15 - 20 minutes. Remove contact lenses, if present and easy to do. Continue rinsing. If eye irritation persists, get medical advice/attention.                                                    |
| <b>Skin contact</b> | Remove contaminated clothing and shoes immediately, then wash with plenty of water. Clean contaminated clothing and shoes before re-use or discard if they cannot be thoroughly cleaned. If skin irritation or rash occurs, get medical advice or attention |
| <b>Ingestion</b>    | Rinse mouth. Never give anything by mouth to an unconscious person. Do not induce vomiting unless told by physician. If vomiting occurs ensure patient can breathe. If you feel unwell, get medical attention.                                              |
| <b>Inhalation</b>   | IF INHALED: Remove victim to fresh air and keep at rest in a position comfortable for breathing. Give artificial respiration if victim is not breathing. If you feel unwell, get medical attention.                                                         |

### Most Important Symptoms and Effects, Both Acute and Delayed

**Most Important Symptoms and Effects** The most important known symptoms and effects are described in the labelling (See section 2) and/or in section 11.

### Indication of immediate medical attention and special treatment needed

**Notes to physician** Treat symptomatically and supportively.

## 5. Fire-fighting measures

### Extinguishing media

**Suitable extinguishing media** Water spray, dry chemical or carbon dioxide

**Unsuitable extinguishing media** None known

### Special hazards arising from the substance or mixture

**Special Hazard** None known

**Hazardous combustion products** Carbon oxides (Cox),

### Protective equipment and precautions for firefighters

Wear self-contained breathing apparatus and protective suit. Use standard firefighting procedures and consider the hazards of involved material.

## 6. Accidental release measures

### Personal precautions, protective equipment and emergency procedures



**Preparation Date** 14-May-2020

**Revision Date** -

**Revision Number** 01

**Personal Precautions**

Do not eat, drink or smoke while using this product. Avoid contact with skin and eyes. Do not breathe dust/mist. Keep unnecessary people away. Ensure adequate ventilation. Isolate area. Keep out of low areas.

**Environmental precautions**

Consult a regulatory specialist to determine appropriate state or local reporting requirements, for assistance in waste characterization and/or hazardous waste disposal and other requirements listed in pertinent environmental permits.

**Methods and material for containment and cleaning up**

**Methods for Clean-Up**

Soak up with inert absorbent material (e.g. sand, silica gel, acid binder, universal binder, sawdust). Follow all label instruction regarding spill clean-up and residual disposal methods.

**Reference to other sections**

Refer to Section 8 - Exposure Controls/Personal Protection and Section 13 - Disposal Considerations.

## 7. Handling and Storage

**Precautions for safe handling**

**Handling**

Avoid contact with skin and eyes. Do not breathe dust/mist. Ensure adequate ventilation. Wash thoroughly after handling. Avoid release to environment. Empty containers may contain hazardous residues. Do not reuse empty container.

**Conditions for safe storage, including any incompatibilities**

**Storage**

Store in accordance with local regulation. Store in original container. Keep containers tightly closed in a cool, well-ventilated place. Keep away from incompatible material. Do not store in unlabelled containers. Do not store material near food, feed or drinking water.

**Incompatible materials**

Strong oxidizing agent

## 8. Exposure Controls/Personal Protection

**Exposure Guideline**

Apply technical measures to comply with the occupational exposure limit.

**Engineering controls**

Ensure adequate ventilation, especially in confined areas. If applicable, use process enclosures, local exhaust ventilation, or other engineering controls to maintain airborne levels below recommended exposure limits. If exposure limits have not been established, maintain airborne levels to an acceptable level.

**Personal protective equipment**

**Eye/Face Protection**

Avoid contact with eyes. Where there is potential for eye contact have eye flushing equipment available. Tightly fitting safety goggles. Face-shield.

**Skin/Hand protection**

Wear protective gloves/clothing. Long-sleeved clothing

**Respiratory protection**

When workers are facing concentrations above the exposure limit they must use appropriate certified respirators.

**Environmental exposure controls**

Prevent further leakage or spillage if safe to do so. Do not let product enter drains. Discharge into the environment must be avoided. Local authorities should be advised if significant spillage cannot be contained.

**General hygiene considerations**

Do not eat, drink or smoke when using this product. Keep away from food, drink and animal feeding stuffs. Wash hands before breaks and immediately after handling the product. Remove and wash contaminated clothing before re-use.

Preparation Date 14-May-2020

Revision Date -

Revision Number 01

## 9. Physical and Chemical Properties

### Information on basic physical and chemical properties

|                |                                 |
|----------------|---------------------------------|
| Appearance     | homogeneous free flowing liquid |
| Physical state | Liquid                          |
| Odor           | No information available        |
| Color          | Pale yellow to light brown      |
| Odor threshold | No information available.       |

| <u>Property</u>                        | <u>VALUES</u>                        | <u>Remarks/ Method</u> |
|----------------------------------------|--------------------------------------|------------------------|
| pH                                     | 4-5                                  |                        |
| Melting point/freezing point           | No information available             |                        |
| Boiling Point/Range                    | No information available             |                        |
| Flash Point                            | >48 °C                               |                        |
| Flammability (solid, gas)              | No information available             |                        |
| Upper/lower flammability or            | No information available             |                        |
| Explosive limit                        | No information available             |                        |
| Density                                | 0.96 – 1.05 at 20°C                  |                        |
| Vapor density                          | No information available             |                        |
| Vapor pressure                         | No information available             |                        |
| Water solubility                       | No information available             |                        |
| Solubility in Other Solvents           | Soluble in Xylene, Naphtha, kerosene |                        |
| Partition coefficient: n-octanol/water | No information available             |                        |
| Autoignition temperature               | No information available             |                        |
| Decomposition temperature              | No information available             |                        |
| VOC Content                            | No information available             |                        |
| Kinematic Viscosity                    | No information available             |                        |
| Oxidizing properties                   | No information available             |                        |
| Explosive properties                   | No information available             |                        |
| Surface Tension                        | No information available             |                        |

## 10. Stability and Reactivity

### Reactivity

No information available

### Chemical stability

Stable under recommended storage conditions.

### Possibility of hazardous reaction

None under normal processing.

### Conditions to avoid

Avoid heat, flames and spark. Avoid contact with incompatible material.

### Incompatible Materials

Strong oxidizing agents

### Hazardous decomposition products

Thermal decomposition can lead to release of irritating or toxic fumes (or gases) in fire.



Preparation Date 14-May-2020

Revision Date -

Revision Number 01

Thermal hazardous decomposition products: Carbon oxides (Cox), Tin oxide

## 11. Toxicological Information

### Information on Toxicological Effects

LD50 Oral = Not Data Available

LD50 Dermal = Not Data Available

LC50 Inhalation = Not Data Available

#### Local effect

|              |                                                                   |
|--------------|-------------------------------------------------------------------|
| Inhalation   | No information available                                          |
| Eye contact  | Causes serious eye irritation. (Based on major component)         |
| Skin contact | Causes Skin irritation. (Based on major component)                |
| Ingestion    | Based on available data, the classification criteria are not met. |

### Chronic toxicity

|                           |                                                                    |
|---------------------------|--------------------------------------------------------------------|
| Skin Corrosion/Irritation | No information available                                           |
| Eye damage/irritation     | No information available                                           |
| Sensitization             | No information available                                           |
| Mutagenic effects         | No information available                                           |
| Carcinogenic effects      | No information available                                           |
| Reproductive effects      | No information available                                           |
| STOT - Single Exposure    | May cause drowsiness or dizziness.                                 |
| STOT - repeated exposure  | May cause damage to organs through prolonged or repeated exposure. |
| Aspiration hazard         | No information available                                           |

## 12. Ecological Information

### Ecotoxicity

- Very toxic to aquatic life
- Toxic to aquatic life with long lasting effects (Based on major component)

LC50/Fish/96hr = No information available

EC50/Daphnia/48hr = No information available

EC50/Alga/72hr = No information available

### Persistence and Degradability

No information available.

### Bioaccumulative Potential

No information available.

### Other Adverse Effects

No information available.



Preparation Date 14-May-2020

Revision Date -

Revision Number 01

## 13. Disposal Considerations

### Waste Treatment Methods

**Waste Disposal Method** Dispose of in accordance with applicable Federal, State, local laws and regulations.

**Contaminated packaging** Empty container should be taken for local recycling, recovery or waste disposal. Do not re-use container. Avoid dispersal of spilt material and runoff and contact with soil, waterways, drains and sewers.

## 14. Transport Information

### IMDG/IMO

|                           |                                              |
|---------------------------|----------------------------------------------|
| 14.1 UN-No                | UN 1993                                      |
| 14.2 Proper Shipping name | FLAMMABLE LIQUID, N.O.S. (petroleum naphtha) |
| 114.3 Hazard class        | 3                                            |
| 14.4 Packing group        | III                                          |
| 14.6 Environmental Hazard | Marine pollutant                             |

### IATA/ICAO

|                           |                                              |
|---------------------------|----------------------------------------------|
| 14.1 UN-No                | UN 1993                                      |
| 14.2 Proper Shipping name | FLAMMABLE LIQUID, N.O.S. (petroleum naphtha) |
| 114.3 Hazard class        | 3                                            |
| 14.4 Packing group        | III                                          |
| 14.5 Environmental Hazard | Marine pollutant                             |

## 15. Regulatory Information

### International Inventories

|               |   |
|---------------|---|
| USINV         | - |
| TSCA          | - |
| EINECS/ELINCS | - |
| DSL/NDL       | - |
| PICCS         | - |
| ENCS          | - |
| China         | - |
| AICS          | - |
| KECL          | - |

- : Not listed/Determines

### Legend

**USINV** - Total TSCA/FIFRA Inventory

**TSCA** - United States Toxic Substances Control Act Section 8(b) Inventory

**DSL/NDL** - Canadian Domestic Substances List/Non-Domestic Substances List

**EINECS/ELINCS** - European Inventory of Existing Chemical Substances/European List of Notified Chemical Substances

**PICCS** - Philippines Inventory of Chemicals and Chemical Substances

**ENCS** - Japan Existing and New Chemical Substances

**AICS** - Australian Inventory of Chemical Substances

**KECL** - Korean Existing and Evaluated Chemical Substances

## 16. Other Information

**Preparation Date**

14-MAY-2020

**Revision date**

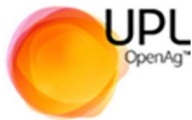

**Preparation Date** 14-May-2020

**Revision Date** -

**Revision Number** 01

## **Revision Summary**

### **Disclaimer**

UPL, Limited. believes that the information and recommendations contained herein (including data and statements) are accurate as of the date hereof. NO WARRANTY OF FITNESS FOR ANY PARTICULAR PURPOSE, WARRANTY OF MERCHANTABILITY OR ANY OTHER WARRANTY, EXPRESSED OR IMPLIED, IS MADE CONCERNING THE INFORMATION PROVIDED HEREIN. The information provided herein relates only to the specific product designated and may not be valid where such product is used in combination with other materials or in any process. Further, since the conditions and methods of use are beyond the control of UPL, Limited. and UPL Limited. expressly disclaims any and all liability as to any results obtained or arising from any use of the product or reliance on such information.

**End of Safety Data Sheet**
